# Supplementary material for: Genetic diversity and cross-species transmission of kobuviruses in Vietnam
Source: PubMed Central journal article supplement — Virus Evol. 2018 Feb 13;4(1):vey002. doi: 10.1093/ve/vey002 (PMC5810437; doi:10.1093/ve/vey002), 2018-02-13
Supplement: vey002_supp.pdf [file vey002_supp.pdf]

Figure S1

Host orders

- human
- lagomorpha
- artiodactyla
- avian
- carnivore
- chiroptera
- rodentia

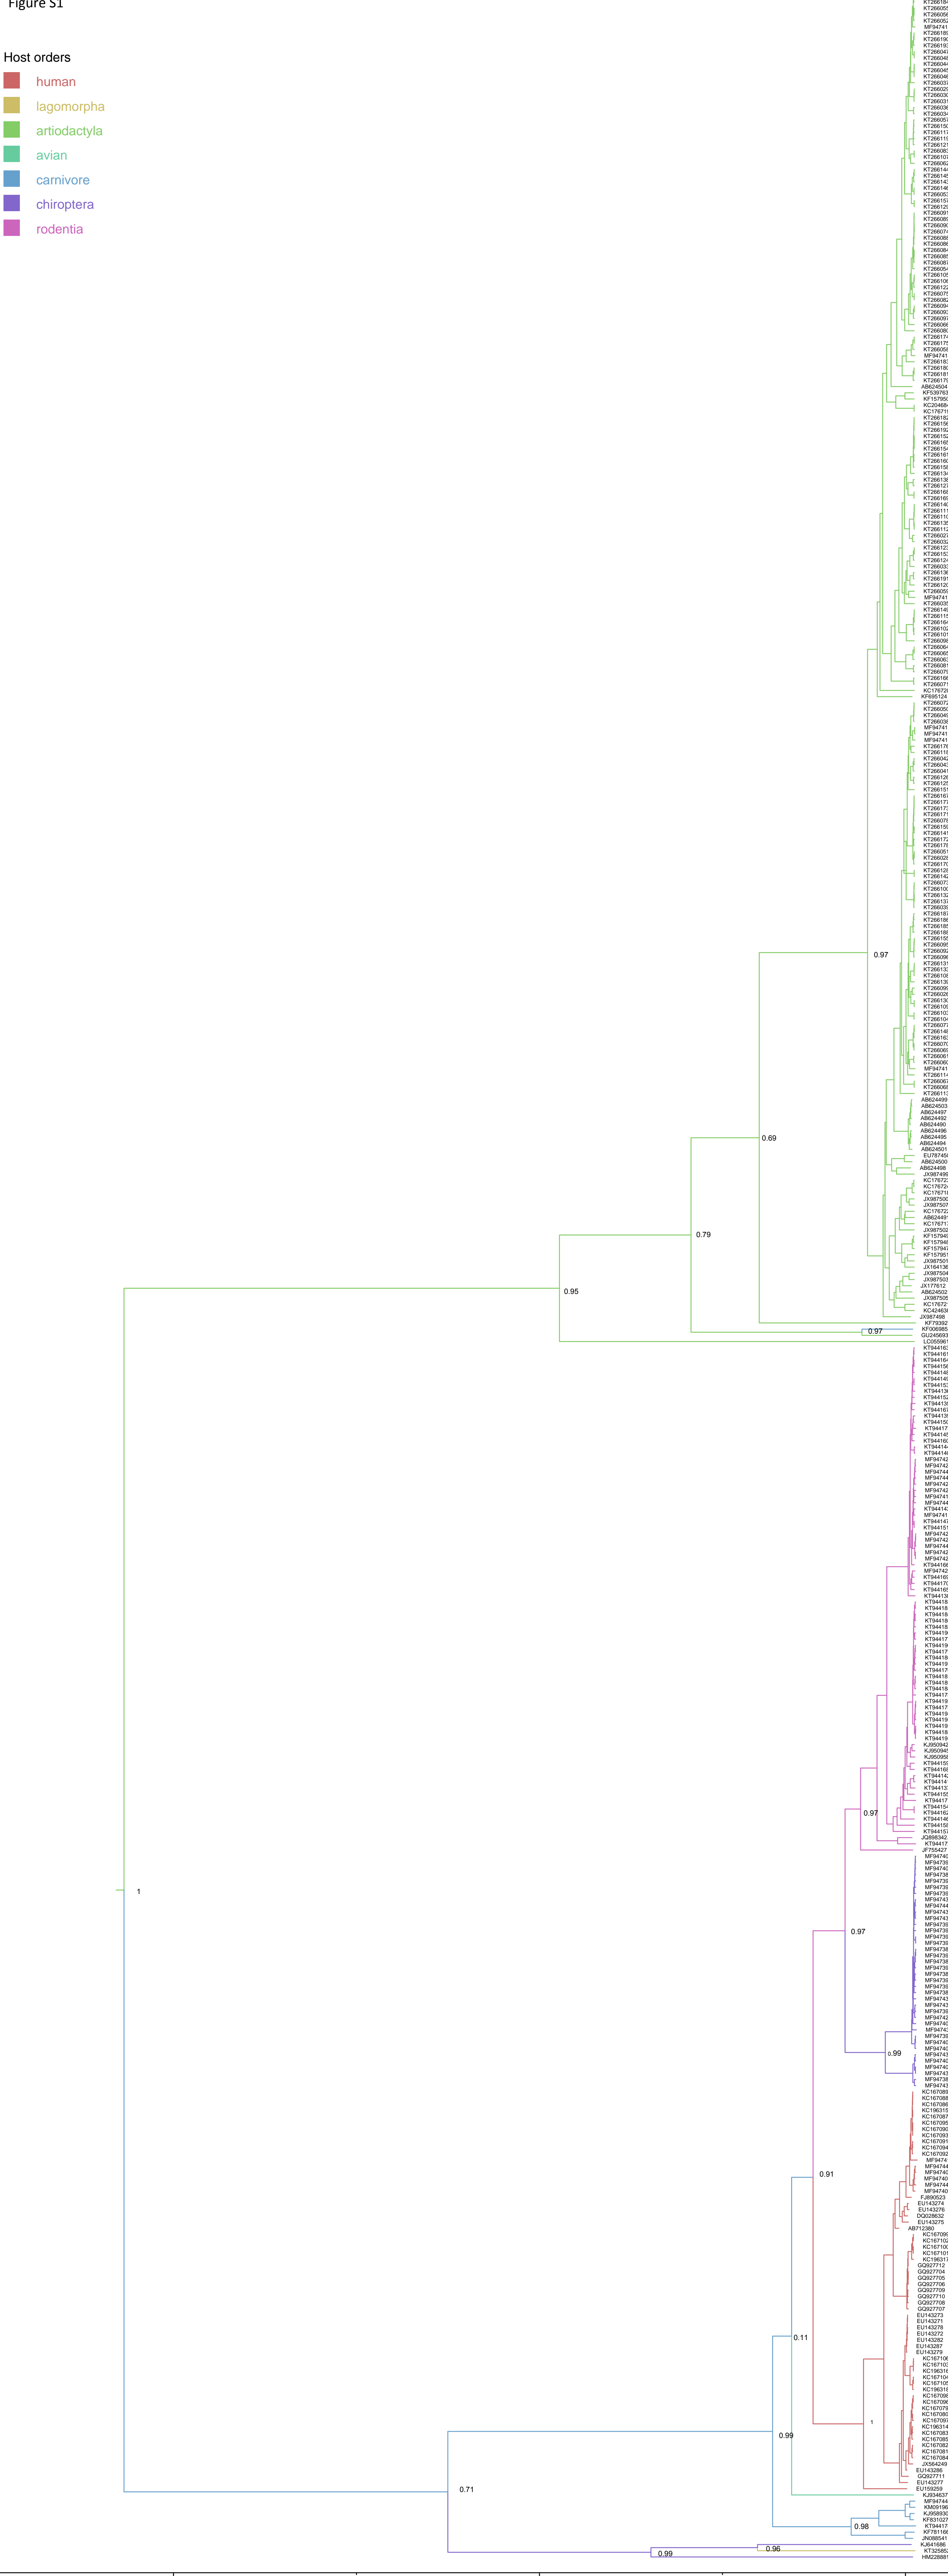

Figure S2

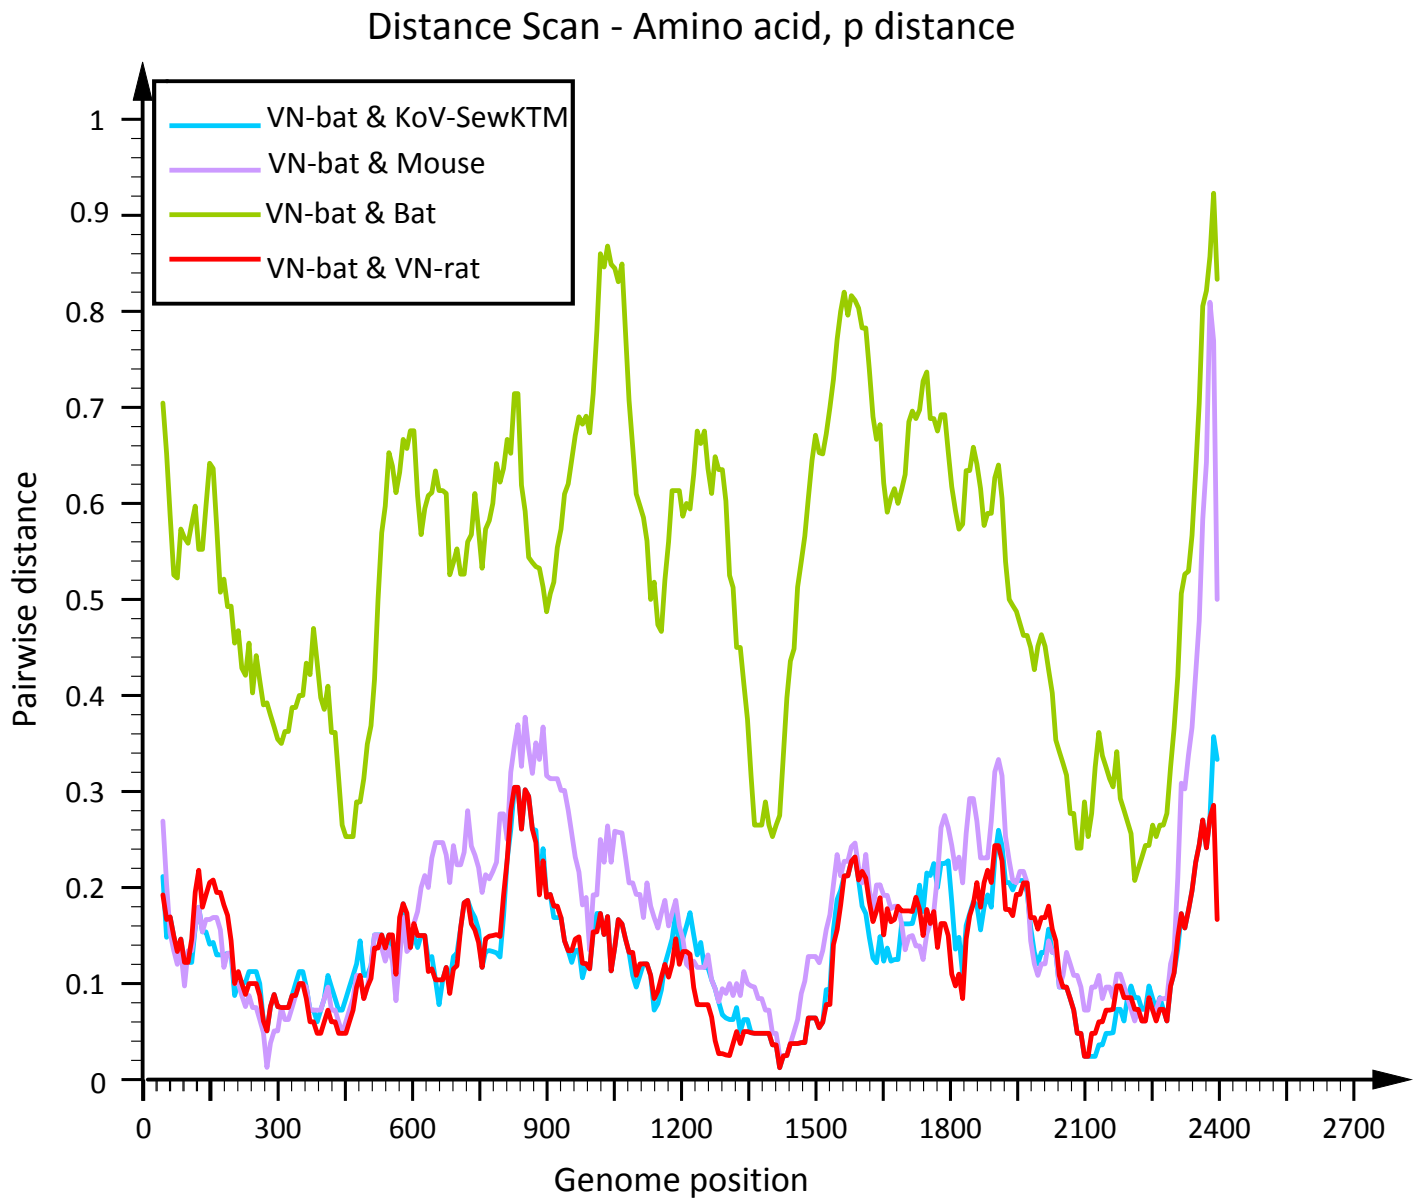

Figure S3

Location

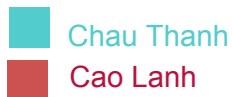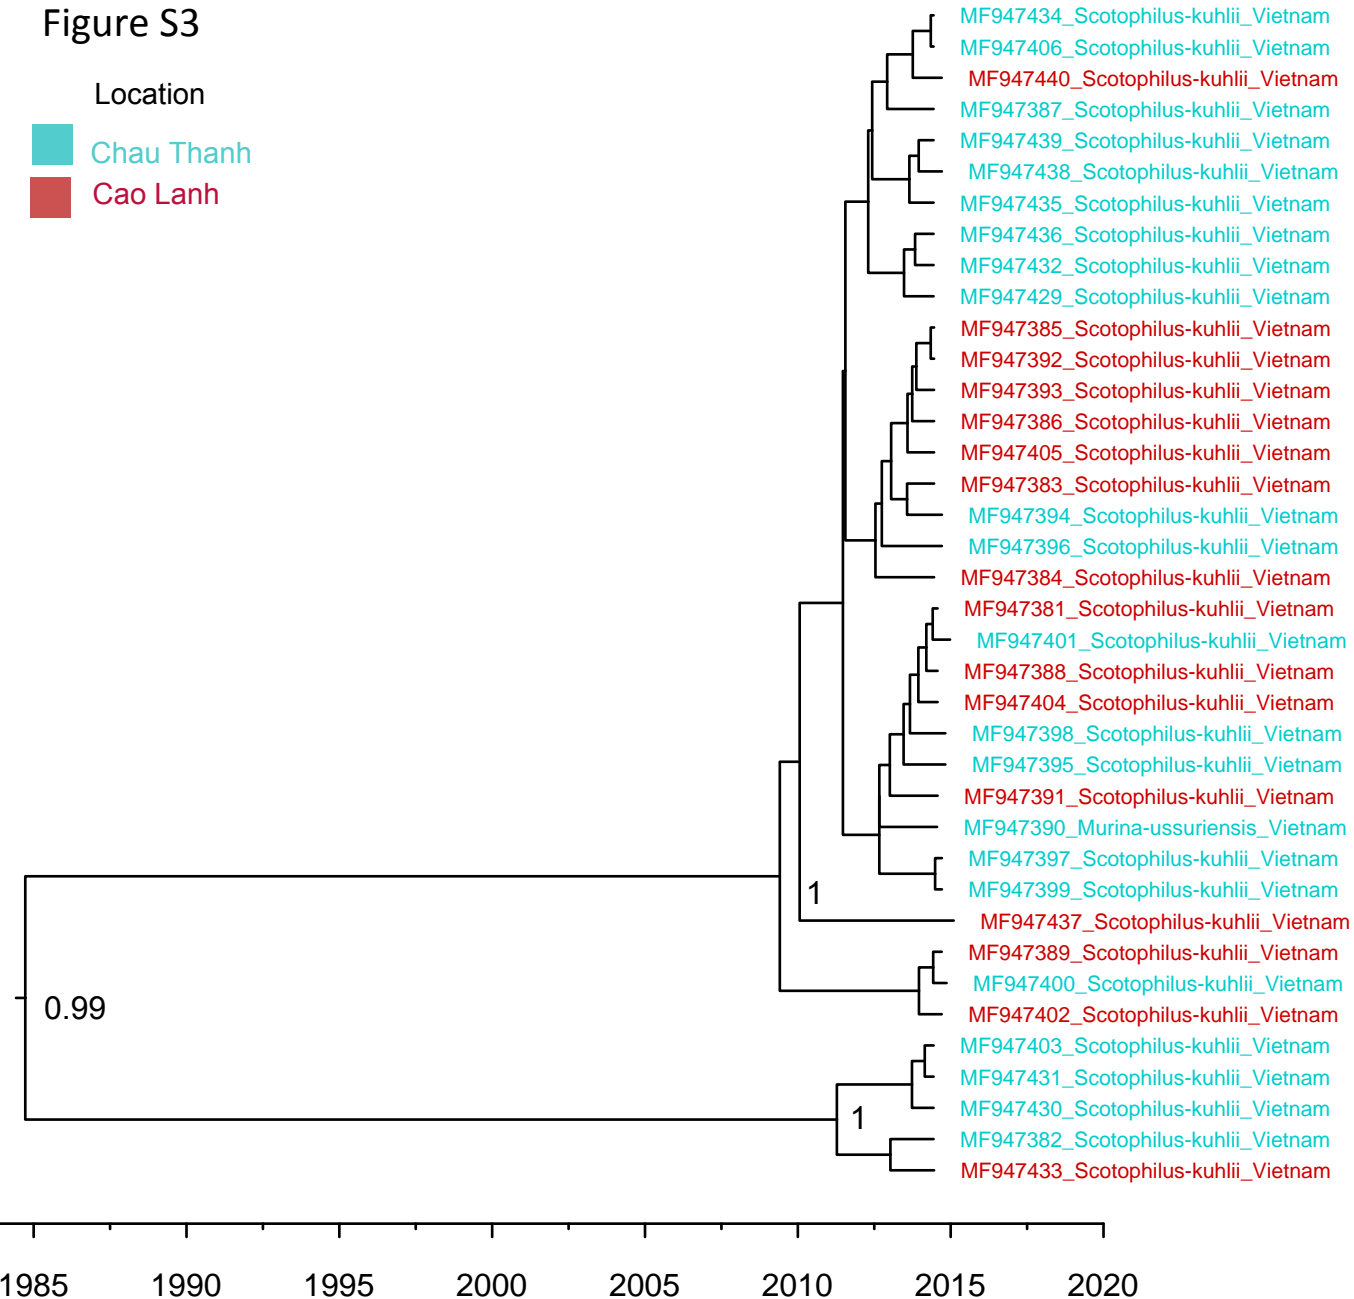

Figure S4

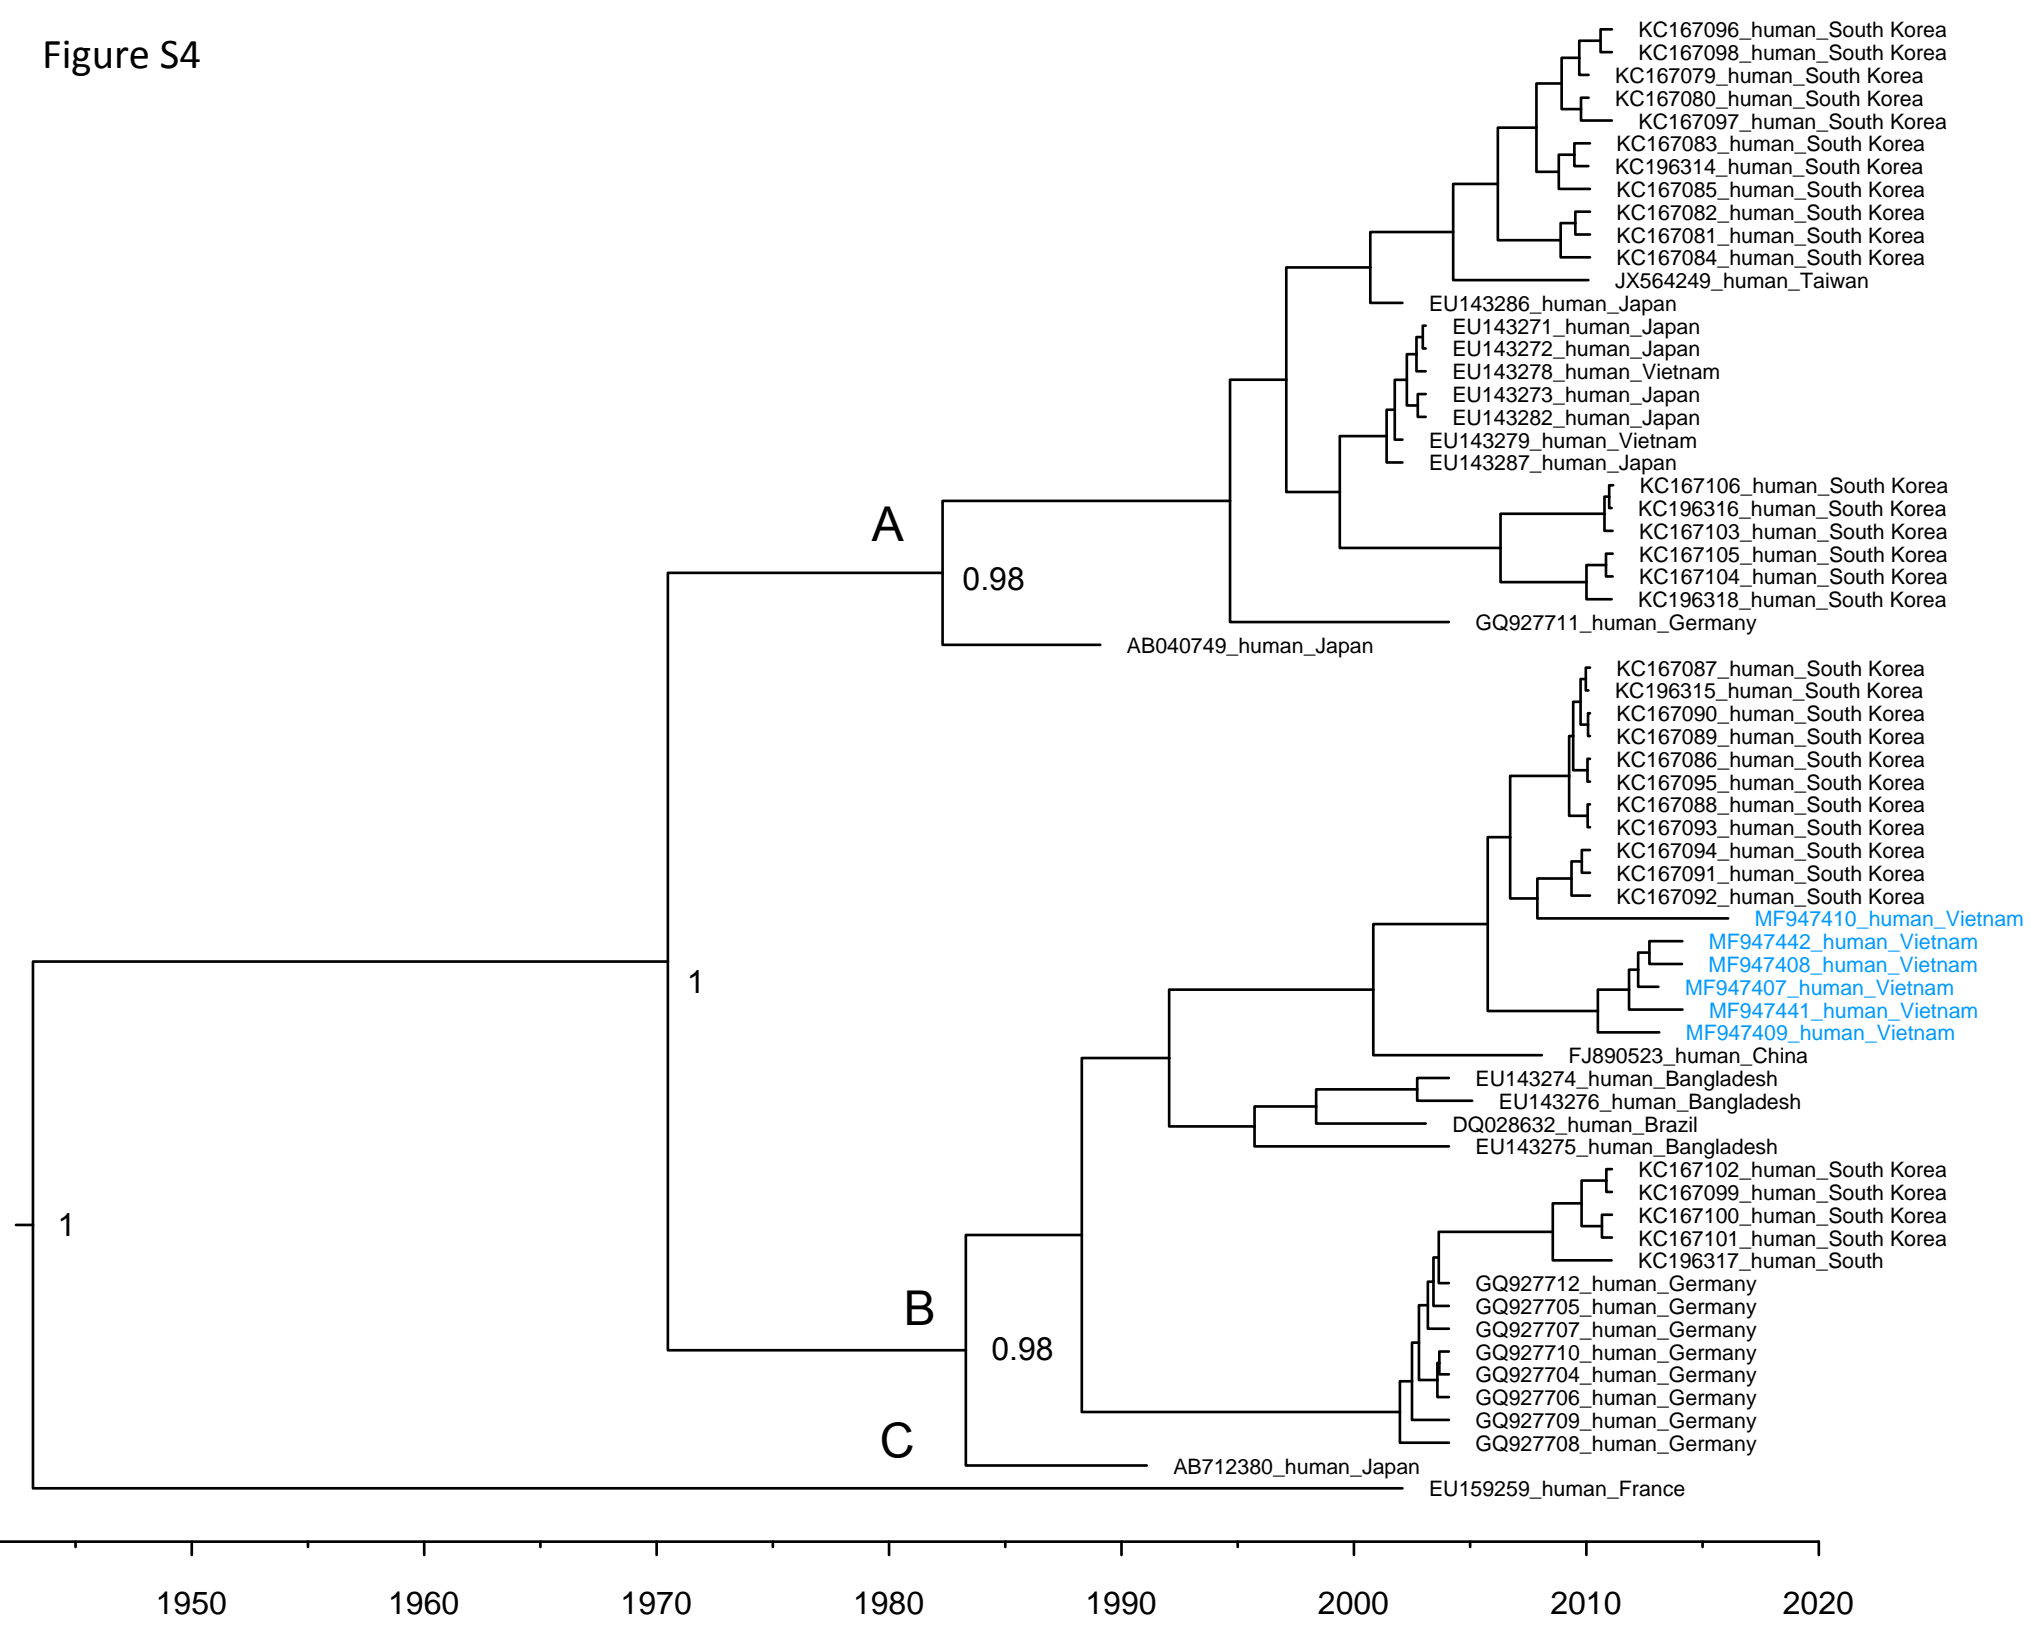

Figure S5

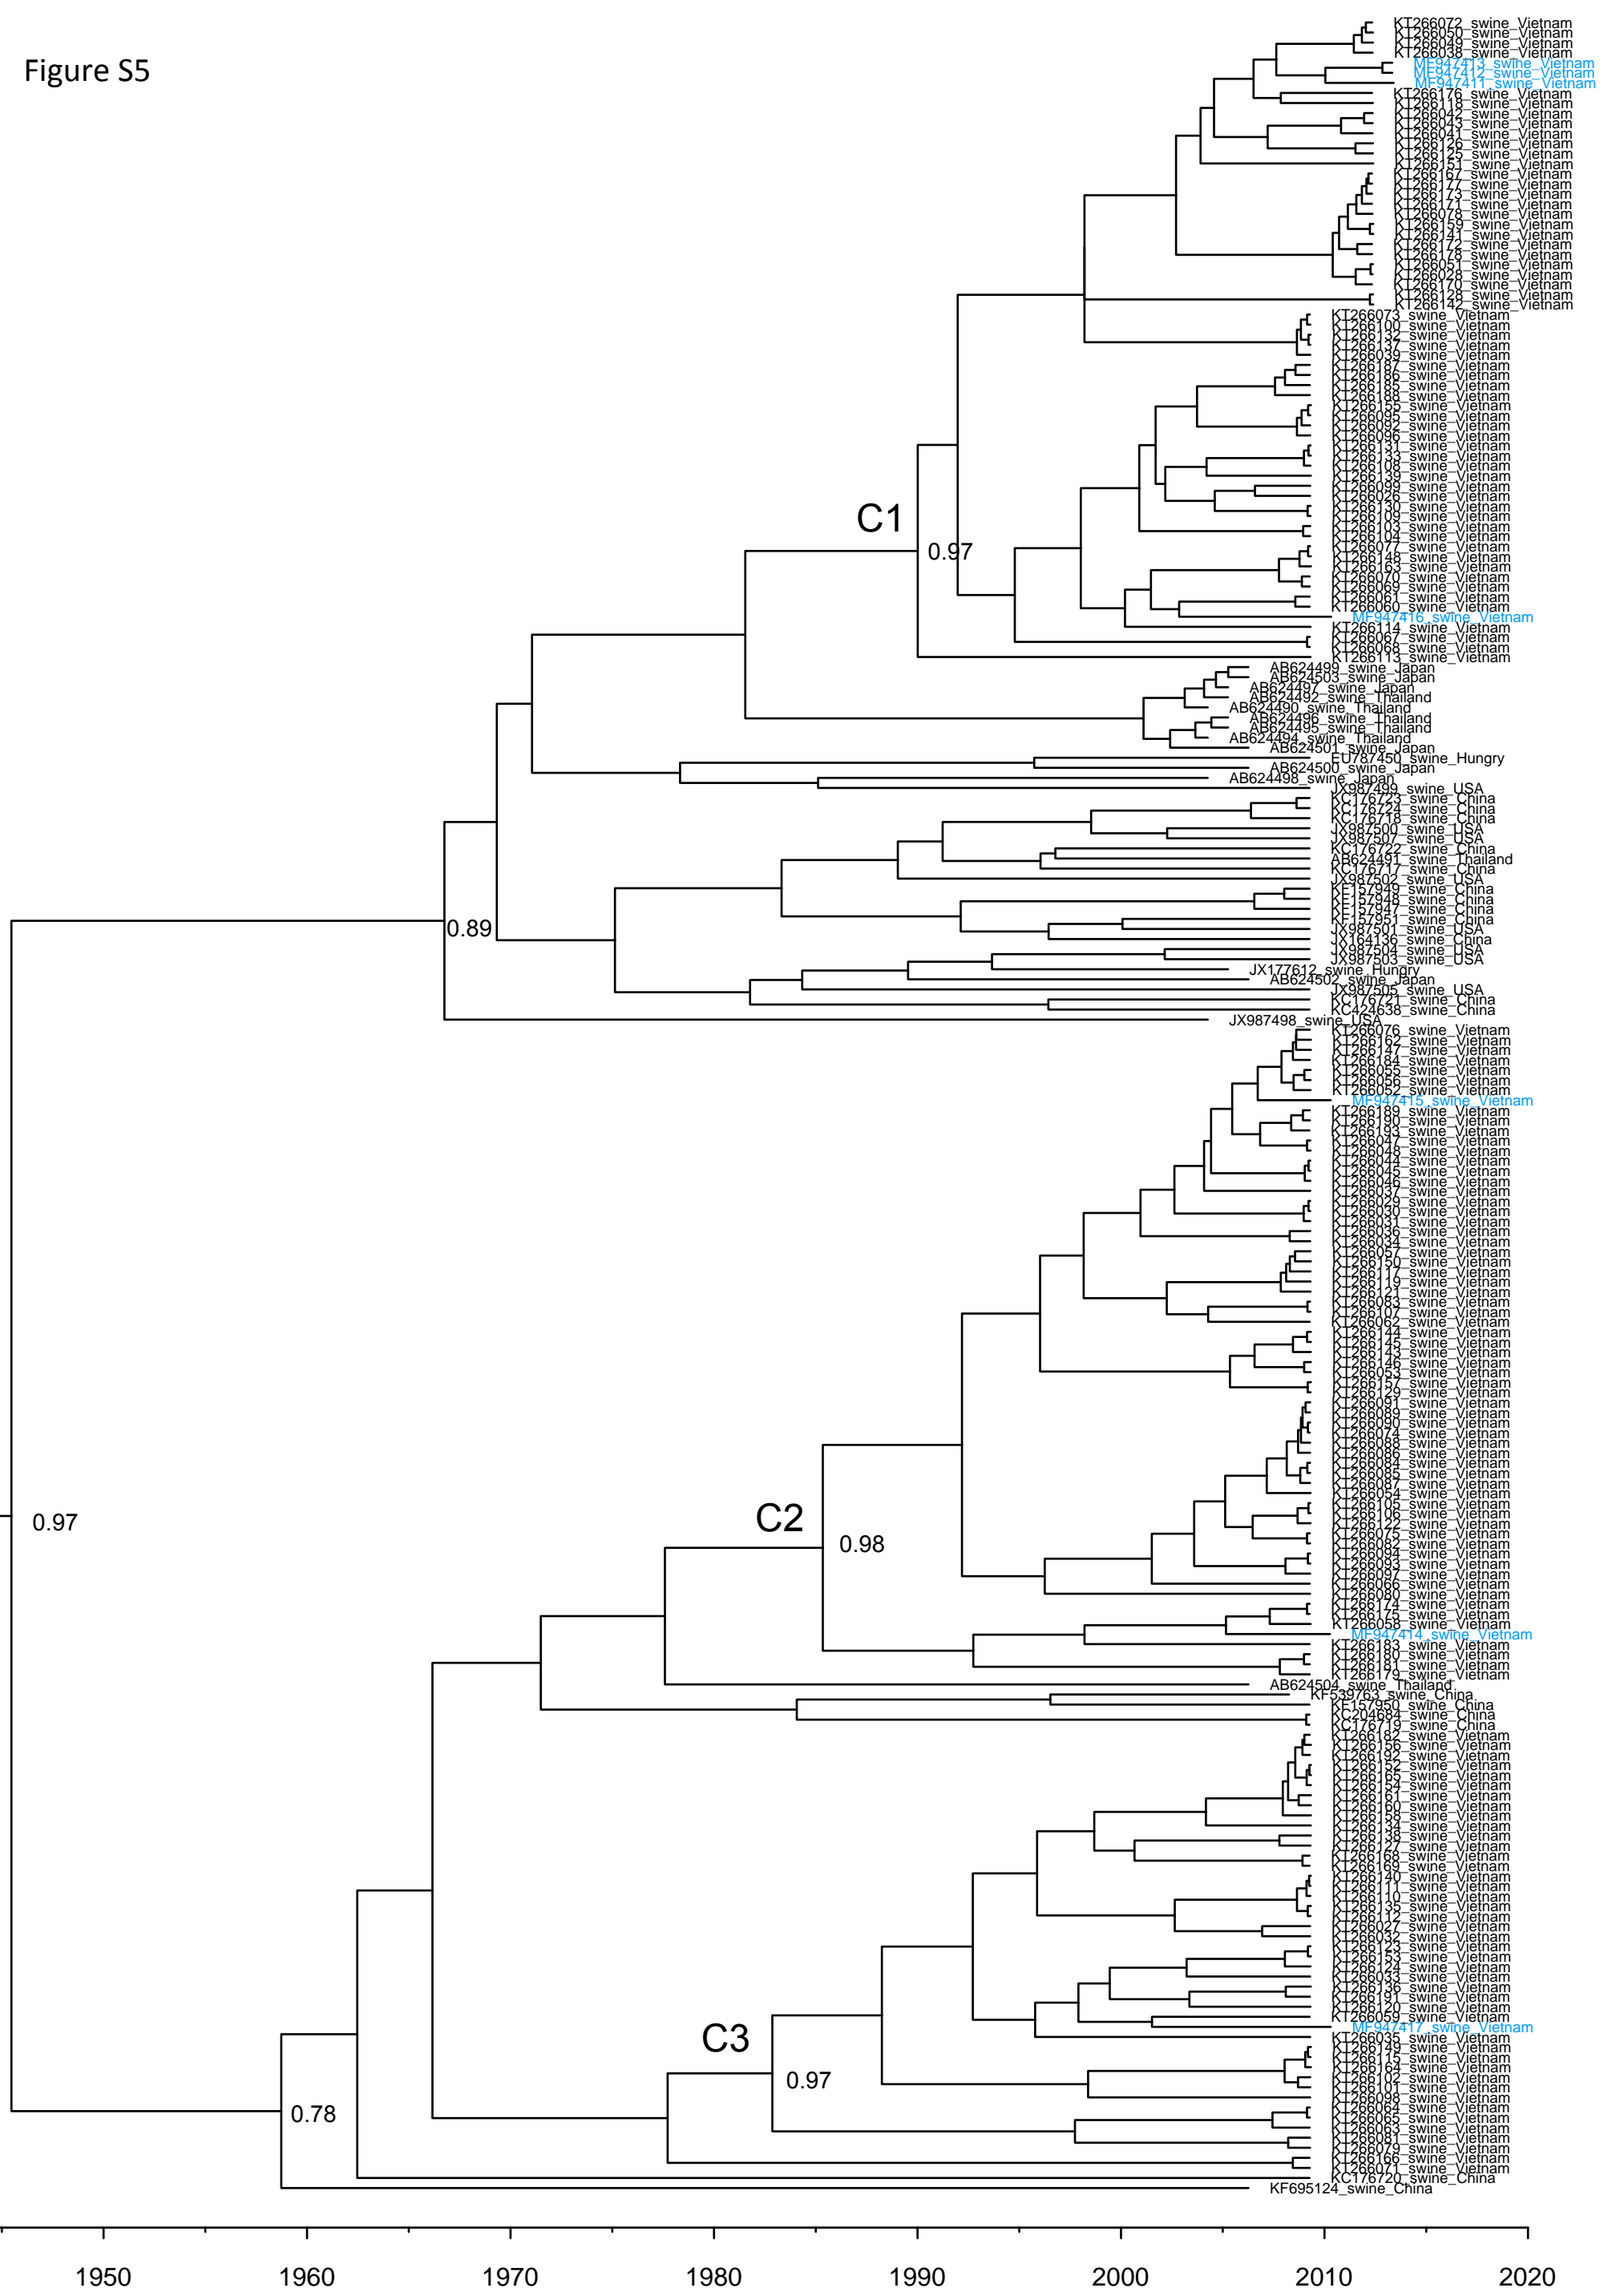

Table S1 Primer sequences for rodent kobuvirus VP1 gene

| Primer                        | Sequences (5'-3')        |
|-------------------------------|--------------------------|
| Kobuvirus_VP1_os <sup>1</sup> | GTCCAYTGGAARACAGTGGACATC |
| Kobuvirus_VP1_oa <sup>2</sup> | ACCGACTCCRAGRGCCARTG     |
| Kobuvirus_VP1_is <sup>3</sup> | TCCTTYAACGTYCGYYTCATGC   |
| Kobuvirus_VP1_ia <sup>4</sup> | CARTGAGAAGCCGGTGTGGG     |

<sup>1</sup>os:oyter sense

<sup>2</sup>is:inner sense

<sup>3</sup>ia:inner antisense

<sup>4</sup>oa:outer antisense

Table S2 Sequences used in this study

| Accession No. <sup>1</sup> | Host order   | Host names/species <sup>2</sup> | Location <sup>3</sup><br>(country,province,district) | Isolation time<br>(dd/mm/yyyy) |
|----------------------------|--------------|---------------------------------|------------------------------------------------------|--------------------------------|
| <b>MF947411</b>            | artiodactyla | swine                           | Vietnam, DongThap, CaoLanh                           | 27/03/2013                     |
| <b>MF947412</b>            | artiodactyla | swine                           | Vietnam, DongThap, CaoLanh                           | 03/04/2013                     |
| <b>MF947413</b>            | artiodactyla | swine                           | Vietnam, DongThap, CaoLanh                           | 03/04/2013                     |
| <b>MF947414</b>            | artiodactyla | swine                           | Vietnam, DongThap, CaoLanh                           | 04/04/2013                     |
| <b>MF947415</b>            | artiodactyla | swine                           | Vietnam, DongThap, ChauThanh                         | 17/04/2013                     |
| <b>MF947416</b>            | artiodactyla | swine                           | Vietnam, DongThap, ChauThanh                         | 24/04/2013                     |
| <b>MF947417</b>            | artiodactyla | swine                           | Vietnam, DongThap, ChauThanh                         | 16/10/2013                     |
| AB624490                   | artiodactyla | swine                           | Thailand                                             | 2007                           |
| AB624491                   | artiodactyla | swine                           | Thailand                                             | 2012                           |
| AB624492                   | artiodactyla | swine                           | Thailand                                             | 2008                           |
| AB624494                   | artiodactyla | swine                           | Thailand                                             | 2007                           |
| AB624495                   | artiodactyla | swine                           | Thailand                                             | 2008                           |
| AB624496                   | artiodactyla | swine                           | Thailand                                             | 2008                           |
| AB624497                   | artiodactyla | swine                           | Japan                                                | 2008                           |
| AB624498                   | artiodactyla | swine                           | Japan                                                | 2007                           |
| AB624499                   | artiodactyla | swine                           | Japan                                                | 2009                           |
| AB624500                   | artiodactyla | swine                           | Japan                                                | 2009                           |
| AB624501                   | artiodactyla | swine                           | Japan                                                | 2009                           |
| AB624502                   | artiodactyla | swine                           | Japan                                                | 2009                           |
| AB624503                   | artiodactyla | swine                           | Japan                                                | 2009                           |
| AB624504                   | artiodactyla | swine                           | Thailand                                             | 2009                           |
| EU787450                   | artiodactyla | swine                           | Hungary                                              | 2012                           |
| GU245693                   | artiodactyla | sheep                           | Hungary                                              | 2009                           |
| JX164136                   | artiodactyla | swine                           | China                                                | 2012                           |
| JX177612                   | artiodactyla | swine                           | Hungary                                              | 2008                           |
| JX987498                   | artiodactyla | swine                           | USA                                                  | 2007                           |
| JX987499                   | artiodactyla | swine                           | USA                                                  | 2012                           |
| JX987500                   | artiodactyla | swine                           | USA                                                  | 2012                           |
| JX987501                   | artiodactyla | swine                           | USA                                                  | 2012                           |
| JX987502                   | artiodactyla | swine                           | USA                                                  | 2012                           |
| JX987503                   | artiodactyla | swine                           | USA                                                  | 2012                           |
| JX987504                   | artiodactyla | swine                           | USA                                                  | 2012                           |
| JX987505                   | artiodactyla | swine                           | USA                                                  | 2012                           |

|          |              |            |             |            |
|----------|--------------|------------|-------------|------------|
| JX987507 | artiodactyla | swine      | USA         | 2012       |
| KC176717 | artiodactyla | swine      | China       | 2012       |
| KC176718 | artiodactyla | swine      | China       | 2012       |
| KC176719 | artiodactyla | swine      | China       | 2012       |
| KC176720 | artiodactyla | swine      | China       | 2012       |
| KC176721 | artiodactyla | swine      | China       | 2012       |
| KC176722 | artiodactyla | swine      | China       | 2012       |
| KC176723 | artiodactyla | swine      | China       | 2012       |
| KC176724 | artiodactyla | swine      | China       | 2012       |
| KC204684 | artiodactyla | swine      | China       | 2012       |
| KC424638 | artiodactyla | swine      | China       | 2012       |
| KF157947 | artiodactyla | swine      | China       | 2012       |
| KF157948 | artiodactyla | swine      | China       | 2012       |
| KF157949 | artiodactyla | swine      | China       | 2012       |
| KF157950 | artiodactyla | swine      | China       | 2012       |
| KF157951 | artiodactyla | swine      | China       | 2012       |
| KF539763 | artiodactyla | swine      | China       | 2011       |
| KF695124 | artiodactyla | swine      | China       | 2009       |
| KF793927 | artiodactyla | black goat | South Korea | 2012       |
| KT266026 | artiodactyla | swine      | Vietnam     | 13/02/2012 |
| KT266027 | artiodactyla | swine      | Vietnam     | 13/02/2012 |
| KT266028 | artiodactyla | swine      | Vietnam     | 13/02/2012 |
| KT266029 | artiodactyla | swine      | Vietnam     | 13/02/2012 |
| KT266030 | artiodactyla | swine      | Vietnam     | 13/02/2012 |
| KT266031 | artiodactyla | swine      | Vietnam     | 14/02/2012 |
| KT266032 | artiodactyla | swine      | Vietnam     | 14/02/2012 |
| KT266033 | artiodactyla | swine      | Vietnam     | 14/02/2012 |
| KT266034 | artiodactyla | swine      | Vietnam     | 14/02/2012 |
| KT266035 | artiodactyla | swine      | Vietnam     | 14/02/2012 |
| KT266036 | artiodactyla | swine      | Vietnam     | 14/02/2012 |
| KT266037 | artiodactyla | swine      | Vietnam     | 15/02/2012 |
| KT266038 | artiodactyla | swine      | Vietnam     | 15/02/2012 |
| KT266039 | artiodactyla | swine      | Vietnam     | 15/02/2012 |
| KT266041 | artiodactyla | swine      | Vietnam     | 15/02/2012 |
| KT266042 | artiodactyla | swine      | Vietnam     | 15/02/2012 |
| KT266043 | artiodactyla | swine      | Vietnam     | 15/02/2012 |
| KT266044 | artiodactyla | swine      | Vietnam     | 15/02/2012 |
| KT266045 | artiodactyla | swine      | Vietnam     | 16/02/2012 |
| KT266046 | artiodactyla | swine      | Vietnam     | 16/02/2012 |
| KT266047 | artiodactyla | swine      | Vietnam     | 16/02/2012 |
| KT266048 | artiodactyla | swine      | Vietnam     | 20/02/2012 |
| KT266049 | artiodactyla | swine      | Vietnam     | 20/02/2012 |
| KT266050 | artiodactyla | swine      | Vietnam     | 20/02/2012 |
| KT266051 | artiodactyla | swine      | Vietnam     | 20/02/2012 |
| KT266052 | artiodactyla | swine      | Vietnam     | 21/02/2012 |
| KT266053 | artiodactyla | swine      | Vietnam     | 21/02/2012 |

|          |              |       |         |            |
|----------|--------------|-------|---------|------------|
| KT266054 | artiodactyla | swine | Vietnam | 21/02/2012 |
| KT266055 | artiodactyla | swine | Vietnam | 21/02/2012 |
| KT266056 | artiodactyla | swine | Vietnam | 21/02/2012 |
| KT266057 | artiodactyla | swine | Vietnam | 21/02/2012 |
| KT266058 | artiodactyla | swine | Vietnam | 22/03/2012 |
| KT266059 | artiodactyla | swine | Vietnam | 05/03/2012 |
| KT266060 | artiodactyla | swine | Vietnam | 05/03/2012 |
| KT266061 | artiodactyla | swine | Vietnam | 06/03/2012 |
| KT266062 | artiodactyla | swine | Vietnam | 06/03/2012 |
| KT266063 | artiodactyla | swine | Vietnam | 06/03/2012 |
| KT266064 | artiodactyla | swine | Vietnam | 06/03/2012 |
| KT266065 | artiodactyla | swine | Vietnam | 06/03/2012 |
| KT266066 | artiodactyla | swine | Vietnam | 06/03/2012 |
| KT266067 | artiodactyla | swine | Vietnam | 07/03/2012 |
| KT266068 | artiodactyla | swine | Vietnam | 06/03/2012 |
| KT266069 | artiodactyla | swine | Vietnam | 07/03/2012 |
| KT266070 | artiodactyla | swine | Vietnam | 07/03/2012 |
| KT266071 | artiodactyla | swine | Vietnam | 07/03/2012 |
| KT266072 | artiodactyla | swine | Vietnam | 07/03/2012 |
| KT266073 | artiodactyla | swine | Vietnam | 07/03/2012 |
| KT266074 | artiodactyla | swine | Vietnam | 07/03/2012 |
| KT266075 | artiodactyla | swine | Vietnam | 08/03/2012 |
| KT266076 | artiodactyla | swine | Vietnam | 08/03/2012 |
| KT266077 | artiodactyla | swine | Vietnam | 12/03/2012 |
| KT266078 | artiodactyla | swine | Vietnam | 12/03/2012 |
| KT266079 | artiodactyla | swine | Vietnam | 12/03/2012 |
| KT266080 | artiodactyla | swine | Vietnam | 12/03/2012 |
| KT266081 | artiodactyla | swine | Vietnam | 12/03/2012 |
| KT266082 | artiodactyla | swine | Vietnam | 12/03/2012 |
| KT266083 | artiodactyla | swine | Vietnam | 12/03/2012 |
| KT266084 | artiodactyla | swine | Vietnam | 12/03/2012 |
| KT266085 | artiodactyla | swine | Vietnam | 12/03/2012 |
| KT266086 | artiodactyla | swine | Vietnam | 12/03/2012 |
| KT266087 | artiodactyla | swine | Vietnam | 12/03/2012 |
| KT266088 | artiodactyla | swine | Vietnam | 12/03/2012 |
| KT266089 | artiodactyla | swine | Vietnam | 12/03/2012 |
| KT266090 | artiodactyla | swine | Vietnam | 12/03/2012 |
| KT266091 | artiodactyla | swine | Vietnam | 14/03/2012 |
| KT266092 | artiodactyla | swine | Vietnam | 14/03/2012 |
| KT266093 | artiodactyla | swine | Vietnam | 14/03/2012 |
| KT266094 | artiodactyla | swine | Vietnam | 14/03/2012 |
| KT266095 | artiodactyla | swine | Vietnam | 14/03/2012 |
| KT266096 | artiodactyla | swine | Vietnam | 14/03/2012 |
| KT266097 | artiodactyla | swine | Vietnam | 14/03/2012 |
| KT266098 | artiodactyla | swine | Vietnam | 14/03/2012 |
| KT266099 | artiodactyla | swine | Vietnam | 15/03/2012 |





|          |              |       |         |            |
|----------|--------------|-------|---------|------------|
| KT266147 | artiodactyla | swine | Vietnam | 26/03/2012 |
| KT266148 | artiodactyla | swine | Vietnam | 26/03/2012 |
| KT266149 | artiodactyla | swine | Vietnam | 27/03/2012 |
| KT266150 | artiodactyla | swine | Vietnam | 27/03/2012 |
| KT266151 | artiodactyla | swine | Vietnam | 27/03/2012 |
| KT266152 | artiodactyla | swine | Vietnam | 27/03/2012 |
| KT266153 | artiodactyla | swine | Vietnam | 27/03/2012 |
| KT266154 | artiodactyla | swine | Vietnam | 27/03/2012 |
| KT266155 | artiodactyla | swine | Vietnam | 27/03/2012 |
| KT266156 | artiodactyla | swine | Vietnam | 27/03/2012 |
| KT266157 | artiodactyla | swine | Vietnam | 27/03/2012 |
| KT266158 | artiodactyla | swine | Vietnam | 27/03/2012 |
| KT266159 | artiodactyla | swine | Vietnam | 27/03/2012 |
| KT266160 | artiodactyla | swine | Vietnam | 27/03/2012 |
| KT266161 | artiodactyla | swine | Vietnam | 27/03/2012 |
| KT266162 | artiodactyla | swine | Vietnam | 27/03/2012 |
| KT266163 | artiodactyla | swine | Vietnam | 27/03/2012 |
| KT266164 | artiodactyla | swine | Vietnam | 27/03/2012 |
| KT266165 | artiodactyla | swine | Vietnam | 27/03/2012 |
| KT266166 | artiodactyla | swine | Vietnam | 03/04/2012 |
| KT266167 | artiodactyla | swine | Vietnam | 03/04/2012 |
| KT266168 | artiodactyla | swine | Vietnam | 03/04/2012 |
| KT266169 | artiodactyla | swine | Vietnam | 03/04/2012 |
| KT266170 | artiodactyla | swine | Vietnam | 03/04/2012 |
| KT266171 | artiodactyla | swine | Vietnam | 03/04/2012 |
| KT266172 | artiodactyla | swine | Vietnam | 03/04/2012 |
| KT266173 | artiodactyla | swine | Vietnam | 04/04/2012 |
| KT266174 | artiodactyla | swine | Vietnam | 04/04/2012 |
| KT266175 | artiodactyla | swine | Vietnam | 04/04/2012 |
| KT266176 | artiodactyla | swine | Vietnam | 04/04/2012 |
| KT266177 | artiodactyla | swine | Vietnam | 05/04/2012 |
| KT266178 | artiodactyla | swine | Vietnam | 05/04/2012 |
| KT266179 | artiodactyla | swine | Vietnam | 05/04/2012 |
| KT266180 | artiodactyla | swine | Vietnam | 05/04/2012 |
| KT266181 | artiodactyla | swine | Vietnam | 05/04/2012 |
| KT266182 | artiodactyla | swine | Vietnam | 05/04/2012 |
| KT266183 | artiodactyla | swine | Vietnam | 05/04/2012 |
| KT266184 | artiodactyla | swine | Vietnam | 09/04/2012 |
| KT266185 | artiodactyla | swine | Vietnam | 09/04/2012 |
| KT266186 | artiodactyla | swine | Vietnam | 09/04/2012 |
| KT266187 | artiodactyla | swine | Vietnam | 09/04/2012 |
| KT266188 | artiodactyla | swine | Vietnam | 09/04/2012 |
| KT266189 | artiodactyla | swine | Vietnam | 09/04/2012 |
| KT266190 | artiodactyla | swine | Vietnam | 10/04/2012 |
| KT266191 | artiodactyla | swine | Vietnam | 10/04/2012 |
| KT266192 | artiodactyla | swine | Vietnam | 10/04/2012 |

|                 |              |                            |                              |            |
|-----------------|--------------|----------------------------|------------------------------|------------|
| KT266193        | artiodactyla | swine                      | Vietnam                      | 2012       |
| LC055961        | artiodactyla | Bos taurus                 | Japan                        | 01/11/2014 |
| KJ934637        | avian        | Coracias garrulus          | Hungary                      | 2011       |
| <b>MF947443</b> | carnivore    | Felis catus                | Vietnam, DongThap, CaoLanh   | 20/03/2013 |
| JN088541        | carnivore    | Canis lupus familiaris     | USA                          | 2010       |
| KF006985        | carnivore    | Mustela putorius furo      | Netherlands                  | 2010       |
| KF781166        | carnivore    | Vulpes vulpes              | Italy                        | 2012       |
| KF831027        | carnivore    | Felis catus                | South Korea                  | 2011       |
| KJ958930        | carnivore    | feline                     | South Korea                  | 2012       |
| KM091960        | carnivore    | Felis catus                | Italy                        | 2013       |
| <b>KT944174</b> | carnivore    | Paradoxurus hermaphroditus | Vietnam, DakLak              | 2014       |
| <b>MF947381</b> | chiroptera   | Scotophilus kuhlii         | Vietnam, DongThap, CaoLanh   | 17/06/2014 |
| <b>MF947382</b> | chiroptera   | Scotophilus kuhlii         | Vietnam, DongThap, ChauThanh | 11/06/2014 |
| <b>MF947383</b> | chiroptera   | Scotophilus kuhlii         | Vietnam, DongThap, CaoLanh   | 17/06/2014 |
| <b>MF947384</b> | chiroptera   | Scotophilus kuhlii         | Vietnam, DongThap, CaoLanh   | 17/06/2014 |
| <b>MF947385</b> | chiroptera   | Scotophilus kuhlii         | Vietnam, DongThap, CaoLanh   | 17/06/2014 |
| <b>MF947386</b> | chiroptera   | Scotophilus kuhlii         | Vietnam, DongThap, CaoLanh   | 17/06/2014 |
| <b>MF947387</b> | chiroptera   | Scotophilus kuhlii         | Vietnam, DongThap, ChauThanh | 11/06/2014 |
| <b>MF947388</b> | chiroptera   | Scotophilus kuhlii         | Vietnam, DongThap, CaoLanh   | 17/06/2014 |
| <b>MF947389</b> | chiroptera   | Scotophilus kuhlii         | Vietnam, DongThap, CaoLanh   | 16/09/2014 |
| <b>MF947390</b> | chiroptera   | Murina ussuriensis         | Vietnam, DongThap, ChauThanh | 11/06/2014 |
| <b>MF947391</b> | chiroptera   | Scotophilus kuhlii         | Vietnam, DongThap, CaoLanh   | 17/06/2014 |
| <b>MF947392</b> | chiroptera   | Scotophilus kuhlii         | Vietnam, DongThap, CaoLanh   | 17/06/2014 |
| <b>MF947393</b> | chiroptera   | Scotophilus kuhlii         | Vietnam, DongThap, CaoLanh   | 17/06/2014 |
| <b>MF947394</b> | chiroptera   | Scotophilus kuhlii         | Vietnam, DongThap, ChauThanh | 18/09/2014 |
| <b>MF947395</b> | chiroptera   | Scotophilus kuhlii         | Vietnam, DongThap, ChauThanh | 18/09/2014 |
| <b>MF947396</b> | chiroptera   | Scotophilus kuhlii         | Vietnam, DongThap, ChauThanh | 18/09/2014 |
| <b>MF947397</b> | chiroptera   | Scotophilus kuhlii         | Vietnam, DongThap, ChauThanh | 18/09/2014 |
| <b>MF947398</b> | chiroptera   | Scotophilus kuhlii         | Vietnam, DongThap, ChauThanh | 18/09/2014 |
| <b>MF947399</b> | chiroptera   | Scotophilus kuhlii         | Vietnam, DongThap, ChauThanh | 18/09/2014 |
| <b>MF947400</b> | chiroptera   | Scotophilus kuhlii         | Vietnam, DongThap, ChauThanh | 13/11/2014 |
| <b>MF947401</b> | chiroptera   | Scotophilus kuhlii         | Vietnam, DongThap, ChauThanh | 13/11/2014 |
| <b>MF947402</b> | chiroptera   | Scotophilus kuhlii         | Vietnam, DongThap, CaoLanh   | 16/09/2014 |
| <b>MF947403</b> | chiroptera   | Scotophilus kuhlii         | Vietnam, DongThap, ChauThanh | 11/06/2014 |
| <b>MF947404</b> | chiroptera   | Scotophilus kuhlii         | Vietnam, DongThap, CaoLanh   | 17/06/2014 |
| <b>MF947405</b> | chiroptera   | Scotophilus kuhlii         | Vietnam, DongThap, CaoLanh   | 17/06/2014 |
| <b>MF947406</b> | chiroptera   | Scotophilus kuhlii         | Vietnam, DongThap, ChauThanh | 11/06/2014 |
| <b>MF947407</b> | human        | Homo sapiens               | Vietnam, DongThap, CaoLanh   | 05/06/2013 |
| <b>MF947408</b> | human        | Homo sapiens               | Vietnam, DongThap, CaoLanh   | 11/08/2014 |
| <b>MF947409</b> | human        | Homo sapiens               | Vietnam, DongThap, CaoLanh   | 19/04/2013 |
| <b>MF947410</b> | human        | Homo sapiens               | Vietnam, DongThap, CaoLanh   | 06/03/2016 |
| <b>MF947429</b> | chiroptera   | Scotophilus kuhlii         | Vietnam, DongThap, ChauThanh | 11/06/2014 |
| <b>MF947430</b> | chiroptera   | Scotophilus kuhlii         | Vietnam, DongThap, ChauThanh | 11/06/2014 |
| <b>MF947431</b> | chiroptera   | Scotophilus kuhlii         | Vietnam, DongThap, ChauThanh | 11/06/2014 |
| <b>MF947432</b> | chiroptera   | Scotophilus kuhlii         | Vietnam, DongThap, ChauThanh | 11/06/2014 |

|                 |            |                    |                              |            |
|-----------------|------------|--------------------|------------------------------|------------|
| <b>MF947433</b> | chiroptera | Scotophilus kuhlii | Vietnam, DongThap, CaoLanh   | 17/06/2014 |
| <b>MF947434</b> | chiroptera | Scotophilus kuhlii | Vietnam, DongThap, ChauThanh | 11/06/2014 |
| <b>MF947435</b> | chiroptera | Scotophilus kuhlii | Vietnam, DongThap, ChauThanh | 11/06/2014 |
| <b>MF947436</b> | chiroptera | Scotophilus kuhlii | Vietnam, DongThap, ChauThanh | 11/06/2014 |
| <b>MF947437</b> | chiroptera | Scotophilus kuhlii | Vietnam, DongThap, CaoLanh   | 06/02/2015 |
| <b>MF947438</b> | chiroptera | Scotophilus kuhlii | Vietnam, DongThap, ChauThanh | 18/09/2014 |
| <b>MF947439</b> | chiroptera | Scotophilus kuhlii | Vietnam, DongThap, ChauThanh | 11/06/2014 |
| <b>MF947440</b> | chiroptera | Scotophilus kuhlii | Vietnam, DongThap, CaoLanh   | 16/09/2014 |
| <b>MF947441</b> | human      | Homo sapiens       | Vietnam, DongThap, CaoLanh   | 19/05/2014 |
| <b>MF947442</b> | human      | Homo sapiens       | Vietnam, DongThap, ChauThanh | 16/07/2014 |
| HM228881        | chiroptera | bat                | USA                          | 2008       |
| KJ641686        | chiroptera | Myotis ricketti    | China                        | 01/10/2010 |
| AB040749        | human      | Homo sapiens       | Japan                        | 1988       |
| AB712380        | human      | Homo sapiens       | Japan                        | 1991       |
| DQ028632        | human      | Homo sapiens       | Brazil                       | 2003       |
| EU143271        | human      | Homo sapiens       | Japan                        | 2003       |
| EU143272        | human      | Homo sapiens       | Japan                        | 2003       |
| EU143273        | human      | Homo sapiens       | Japan                        | 2003       |
| EU143274        | human      | Homo sapiens       | Bangladesh                   | 2004       |
| EU143275        | human      | Homo sapiens       | Bangladesh                   | 2004       |
| EU143276        | human      | Homo sapiens       | Bangladesh                   | 2005       |
| EU143278        | human      | Homo sapiens       | Vietnam                      | 2003       |
| EU143279        | human      | Homo sapiens       | Vietnam                      | 2002       |
| EU143282        | human      | Homo sapiens       | Japan                        | 2003       |
| EU143286        | human      | Homo sapiens       | Japan                        | 2002       |
| EU143287        | human      | Homo sapiens       | Japan                        | 2002       |
| EU159259        | human      | Homo sapiens       | France                       | 2002       |
| FJ890523        | human      | Homo sapiens       | China                        | 2008       |
| GQ927704        | human      | Homo sapiens       | Germany                      | 2004       |
| GQ927705        | human      | Homo sapiens       | Germany                      | 2004       |
| GQ927706        | human      | Homo sapiens       | Germany                      | 2004       |
| GQ927707        | human      | Homo sapiens       | Germany                      | 2004       |
| GQ927708        | human      | Homo sapiens       | Germany                      | 2004       |
| GQ927709        | human      | Homo sapiens       | Germany                      | 2004       |
| GQ927710        | human      | Homo sapiens       | Germany                      | 2004       |
| GQ927711        | human      | Homo sapiens       | Germany                      | 2004       |
| GQ927712        | human      | Homo sapiens       | Germany                      | 2004       |
| JX564249        | human      | Homo sapiens       | China-Taiwan                 | 2010       |
| KC167079        | human      | Homo sapiens       | South Korea                  | 04/02/2010 |
| KC167080        | human      | Homo sapiens       | South Korea                  | 04/02/2010 |
| KC167081        | human      | Homo sapiens       | South Korea                  | 26/02/2010 |
| KC167082        | human      | Homo sapiens       | South Korea                  | 26/02/2010 |
| KC167083        | human      | Homo sapiens       | South Korea                  | 26/02/2010 |
| KC167084        | human      | Homo sapiens       | South Korea                  | 26/02/2010 |
| KC167085        | human      | Homo sapiens       | South Korea                  | 26/02/2010 |
| KC167086        | human      | Homo sapiens       | South Korea                  | 26/02/2010 |

|                 |            |                       |                            |            |
|-----------------|------------|-----------------------|----------------------------|------------|
| KC167087        | human      | Homo sapiens          | South Korea                | 26/02/2010 |
| KC167088        | human      | Homo sapiens          | South Korea                | 26/02/2010 |
| KC167089        | human      | Homo sapiens          | South Korea                | 26/02/2010 |
| KC167090        | human      | Homo sapiens          | South Korea                | 26/02/2010 |
| KC167091        | human      | Homo sapiens          | South Korea                | 26/02/2010 |
| KC167092        | human      | Homo sapiens          | South Korea                | 26/02/2010 |
| KC167093        | human      | Homo sapiens          | South Korea                | 26/02/2010 |
| KC167094        | human      | Homo sapiens          | South Korea                | 26/02/2010 |
| KC167095        | human      | Homo sapiens          | South Korea                | 26/02/2010 |
| KC167096        | human      | Homo sapiens          | South Korea                | 05/01/2011 |
| KC167097        | human      | Homo sapiens          | South Korea                | 05/01/2011 |
| KC167098        | human      | Homo sapiens          | South Korea                | 05/01/2011 |
| KC167099        | human      | Homo sapiens          | South Korea                | 06/01/2011 |
| KC167100        | human      | Homo sapiens          | South Korea                | 06/01/2011 |
| KC167101        | human      | Homo sapiens          | South Korea                | 06/01/2011 |
| KC167102        | human      | Homo sapiens          | South Korea                | 06/01/2011 |
| KC167103        | human      | Homo sapiens          | South Korea                | 16/02/2011 |
| KC167104        | human      | Homo sapiens          | South Korea                | 17/02/2011 |
| KC167105        | human      | Homo sapiens          | South Korea                | 17/02/2011 |
| KC167106        | human      | Homo sapiens          | South Korea                | 25/02/2011 |
| KC196314        | human      | Homo sapiens          | South Korea                | 01/12/2010 |
| KC196315        | human      | Homo sapiens          | South Korea                | 01/12/2010 |
| KC196316        | human      | Homo sapiens          | South Korea                | 01/01/2011 |
| KC196317        | human      | Homo sapiens          | South Korea                | 01/01/2011 |
| KC196318        | human      | Homo sapiens          | South Korea                | 01/03/2011 |
| KT325852        | lagomorpha | Oryctolagus cuniculus | Hungary                    | 01/04/2013 |
| <b>MF947418</b> | rodentia   | Rattus argentiventer  | Vietnam, DongThap, TamNong | 12/11/2014 |
| <b>MF947419</b> | rodentia   | Rattus argentiventer  | Vietnam, DongThap, CaoLanh | 09/12/2013 |
| <b>MF947420</b> | rodentia   | Rattus losea          | Vietnam, DongThap, CaoLanh | 12/06/2013 |
| <b>MF947421</b> | rodentia   | Rattus argentiventer  | Vietnam, DongThap, TamNong | 12/11/2014 |
| <b>MF947422</b> | rodentia   | Rattus argentiventer  | Vietnam, DongThap, TamNong | 12/11/2014 |
| <b>MF947423</b> | rodentia   | Rattus argentiventer  | Vietnam, DongThap, TamNong | 12/11/2014 |
| <b>MF947424</b> | rodentia   | Rattus argentiventer  | Vietnam, DongThap, TamNong | 12/11/2014 |
| <b>MF947425</b> | rodentia   | Rattus argentiventer  | Vietnam, DongThap, CaoLanh | 14/11/2014 |
| <b>MF947426</b> | rodentia   | Rattus argentiventer  | Vietnam, DongThap, CaoLanh | 14/11/2014 |
| <b>MF947427</b> | rodentia   | Rattus argentiventer  | Vietnam, DongThap, CaoLanh | 14/11/2014 |
| <b>MF947428</b> | rodentia   | Rattus argentiventer  | Vietnam, DongThap, CaoLanh | 14/11/2014 |
| <b>MF947444</b> | rodentia   | Rattus argentiventer  | Vietnam, DongThap, TamNong | 12/11/2014 |
| <b>MF947445</b> | rodentia   | Rattus argentiventer  | Vietnam, DongThap, TamNong | 12/11/2014 |
| <b>MF947446</b> | rodentia   | Rattus argentiventer  | Vietnam, DongThap, TamNong | 12/11/2014 |
| <b>MF947447</b> | rodentia   | Rattus argentiventer  | Vietnam, DongThap, CaoLanh | 14/11/2014 |
| JF755427        | rodentia   | Peromyscus crinitus   | USA                        | 30/05/2010 |
| KJ950942        | rodentia   | Rattus norvegicus     | USA                        | 02/12/2012 |
| KJ950945        | rodentia   | Rattus norvegicus     | USA                        | 20/04/2013 |
| KJ950958        | rodentia   | Rattus norvegicus     | USA                        | 27/04/2013 |
| <b>KT944135</b> | rodentia   | Bandicota indica      | Vietnam, DakLak            | 01/03/2013 |

|                 |          |                             |                   |            |
|-----------------|----------|-----------------------------|-------------------|------------|
| <b>KT944136</b> | rodentia | <i>Bandicota indica</i>     | Vietnam, DakLak   | 01/03/2013 |
| <b>KT944137</b> | rodentia | <i>Rattus exulans</i>       | Vietnam, DakLak   | 01/03/2013 |
| <b>KT944138</b> | rodentia | <i>Rattus argentiventer</i> | Vietnam, DakLak   | 01/03/2013 |
| <b>KT944139</b> | rodentia | <i>Rattus tanezumi</i>      | Vietnam, DakLak   | 01/03/2013 |
| <b>KT944140</b> | rodentia | <i>Rattus norvegicus</i>    | Vietnam, DakLak   | 01/03/2013 |
| <b>KT944141</b> | rodentia | <i>Rattus norvegicus</i>    | Vietnam, DakLak   | 01/03/2013 |
| <b>KT944142</b> | rodentia | <i>Rattus norvegicus</i>    | Vietnam, DakLak   | 01/03/2013 |
| <b>KT944143</b> | rodentia | <i>Rattus tanezumi</i>      | Vietnam, DakLak   | 01/03/2013 |
| <b>KT944144</b> | rodentia | <i>Rattus norvegicus</i>    | Vietnam, DakLak   | 01/03/2013 |
| <b>KT944145</b> | rodentia | <i>Bandicota indica</i>     | Vietnam, DongThap | 01/10/2012 |
| <b>KT944146</b> | rodentia | <i>Bandicota indica</i>     | Vietnam, DongThap | 01/10/2012 |
| <b>KT944147</b> | rodentia | <i>Bandicota indica</i>     | Vietnam, DongThap | 01/10/2012 |
| <b>KT944148</b> | rodentia | <i>Bandicota indica</i>     | Vietnam, DongThap | 01/10/2012 |
| <b>KT944149</b> | rodentia | <i>Bandicota indica</i>     | Vietnam, DongThap | 01/10/2012 |
| <b>KT944150</b> | rodentia | <i>Bandicota indica</i>     | Vietnam, DongThap | 01/10/2012 |
| <b>KT944151</b> | rodentia | <i>Bandicota indica</i>     | Vietnam, DongThap | 01/10/2012 |
| <b>KT944152</b> | rodentia | <i>Rattus tanezumi</i>      | Vietnam, DongThap | 01/10/2012 |
| <b>KT944153</b> | rodentia | <i>Rattus tanezumi</i>      | Vietnam, DongThap | 01/10/2012 |
| <b>KT944154</b> | rodentia | <i>Rattus tanezumi</i>      | Vietnam, DongThap | 01/10/2012 |
| <b>KT944155</b> | rodentia | <i>Rattus norvegicus</i>    | Vietnam, DongThap | 01/10/2012 |
| <b>KT944156</b> | rodentia | <i>Rattus norvegicus</i>    | Vietnam, DongThap | 01/10/2012 |
| <b>KT944157</b> | rodentia | <i>Rattus norvegicus</i>    | Vietnam, DongThap | 01/10/2012 |
| <b>KT944158</b> | rodentia | <i>Rattus norvegicus</i>    | Vietnam, DongThap | 01/10/2012 |
| <b>KT944159</b> | rodentia | <i>Rattus norvegicus</i>    | Vietnam, DongThap | 01/10/2012 |
| <b>KT944160</b> | rodentia | <i>Rattus norvegicus</i>    | Vietnam, DongThap | 01/10/2012 |
| <b>KT944161</b> | rodentia | <i>Rattus tanezumi</i>      | Vietnam, DongThap | 01/10/2012 |
| <b>KT944162</b> | rodentia | <i>Rattus tanezumi</i>      | Vietnam, DongThap | 01/10/2012 |
| <b>KT944163</b> | rodentia | <i>Rattus tanezumi</i>      | Vietnam, DongThap | 01/10/2012 |
| <b>KT944164</b> | rodentia | <i>Rattus argentiventer</i> | Vietnam, DongThap | 01/10/2012 |
| <b>KT944165</b> | rodentia | <i>Bandicota indica</i>     | Vietnam, DongThap | 01/10/2012 |
| <b>KT944166</b> | rodentia | <i>Rattus argentiventer</i> | Vietnam, DongThap | 01/10/2012 |
| <b>KT944167</b> | rodentia | <i>Rattus argentiventer</i> | Vietnam, DongThap | 01/10/2012 |
| <b>KT944168</b> | rodentia | <i>Rattus argentiventer</i> | Vietnam, DongThap | 01/10/2012 |
| <b>KT944169</b> | rodentia | <i>Rattus argentiventer</i> | Vietnam, DongThap | 01/10/2012 |
| <b>KT944170</b> | rodentia | <i>Rattus argentiventer</i> | Vietnam, DongThap | 01/10/2012 |
| <b>KT944171</b> | rodentia | <i>Rattus norvegicus</i>    | Vietnam, DakLak   | 01/04/2014 |
| <b>KT944172</b> | rodentia | <i>Rattus tanezumi</i>      | Vietnam, DakLak   | 01/04/2014 |
| <b>KT944173</b> | rodentia | <i>Rattus exulans</i>       | Vietnam, DakLak   | 01/05/2014 |
| <b>KT944175</b> | rodentia | <i>Rhizomys pruinosus</i>   | Vietnam, DakLak   | 01/06/2014 |
| <b>KT944176</b> | rodentia | <i>Rhizomys pruinosus</i>   | Vietnam, DakLak   | 01/06/2014 |
| <b>KT944177</b> | rodentia | <i>Rhizomys pruinosus</i>   | Vietnam, DakLak   | 01/06/2014 |
| <b>KT944178</b> | rodentia | <i>Rhizomys pruinosus</i>   | Vietnam, DakLak   | 01/06/2014 |
| <b>KT944179</b> | rodentia | <i>Rhizomys pruinosus</i>   | Vietnam, DakLak   | 01/06/2014 |
| <b>KT944180</b> | rodentia | <i>Rhizomys pruinosus</i>   | Vietnam, DakLak   | 01/06/2014 |
| <b>KT944181</b> | rodentia | <i>Rhizomys pruinosus</i>   | Vietnam, DakLak   | 01/06/2014 |
| <b>KT944182</b> | rodentia | <i>Rhizomys pruinosus</i>   | Vietnam, DakLak   | 01/06/2014 |

|                 |          |                    |                 |            |
|-----------------|----------|--------------------|-----------------|------------|
| <b>KT944183</b> | rodentia | Rhizomys pruinosus | Vietnam, DakLak | 01/06/2014 |
| <b>KT944184</b> | rodentia | Rhizomys pruinosus | Vietnam, DakLak | 01/06/2014 |
| <b>KT944185</b> | rodentia | Rhizomys pruinosus | Vietnam, DakLak | 01/06/2014 |
| <b>KT944186</b> | rodentia | Rhizomys pruinosus | Vietnam, DakLak | 01/06/2014 |
| <b>KT944187</b> | rodentia | Rhizomys pruinosus | Vietnam, DakLak | 01/06/2014 |
| <b>KT944188</b> | rodentia | Rhizomys pruinosus | Vietnam, DakLak | 01/06/2014 |
| <b>KT944189</b> | rodentia | Rhizomys pruinosus | Vietnam, DakLak | 01/06/2014 |
| <b>KT944190</b> | rodentia | Rhizomys pruinosus | Vietnam, DakLak | 01/06/2014 |
| <b>KT944191</b> | rodentia | Rhizomys pruinosus | Vietnam, DakLak | 01/06/2014 |
| <b>KT944192</b> | rodentia | Rhizomys pruinosus | Vietnam, DakLak | 01/06/2014 |
| <b>KT944193</b> | rodentia | Rhizomys pruinosus | Vietnam, DakLak | 01/06/2014 |
| <b>KT944194</b> | rodentia | Rhizomys pruinosus | Vietnam, DakLak | 01/06/2014 |
| <b>KT944195</b> | rodentia | Rhizomys pruinosus | Vietnam, DakLak | 01/06/2014 |
| <b>KT944196</b> | rodentia | Rhizomys pruinosus | Vietnam, DakLak | 01/06/2014 |
| <b>KT944197</b> | rodentia | Rhizomys pruinosus | Vietnam, DakLak | 01/06/2014 |
| JQ898342.1      | unknown  | sewage             | Nepal           | 14/08/2009 |

<sup>1</sup>Sequences obtained in this study are highlighted in bold.

<sup>2</sup> Host information of all sequences. Species names are listed if available; the host names shown in Genbank are listed if species names are unclear.

<sup>3</sup>Location information (country) of all sequences. For sequences obtained in this study, additional information of province and district are listed if available.

Table S3 Cross-species transmission rate of rodent kobuviruses among 7 rodent species

| Donors               | Receipients          | Mean rate <sup>1</sup> | BF <sup>2</sup> |
|----------------------|----------------------|------------------------|-----------------|
| Bandicota-indica     | Rattus-argentiventer | 0.04                   | 9               |
| Bandicota-indica     | Rattus-exulans       | 0.02                   | 9               |
| Bandicota-indica     | Rattus-norvegicus    | 0.04                   | 16              |
| Bandicota-indica     | Rattus-tanezumi      | 0.06                   | 85              |
| Rattus-argentiventer | Rattus-losea         | 0.01                   | 27              |
| Rattus-argentiventer | Bandicota-indica     | 0.05                   | 17              |
| Rattus-norvegicus    | Rhizomys-pruinosus   | 0.01                   | 5               |
| Rattus-norvegicus    | Rattus-argentiventer | 0.02                   | 6               |
| Rattus-norvegicus    | Rattus-exulans       | 0.01                   | 5               |
| Rattus-tanezumi      | Rattus-norvegicus    | 0.03                   | 5               |

<sup>1</sup> Mean rate of viral lineage migration between rodent species (exchanges year<sup>-1</sup>).

<sup>2</sup> Pairs of transmissions with Bayes Factor  $\geq 5$  are shown.
